# Supplementary material for: Early Intervention for Spinal Cord Injury with Human Induced Pluripotent Stem Cells Oligodendrocyte Progenitors
Source: PLoS One. 2015 Jan 30;10(1):e0116933. doi: 10.1371/journal.pone.0116933 (PMC4311989; doi:10.1371/journal.pone.0116933)

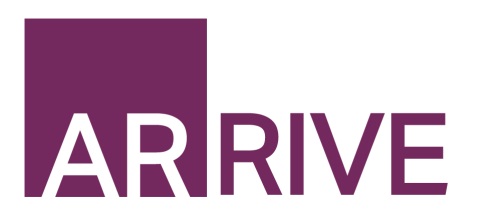


The ARRIVE Guidelines Checklist

Animal Research: Reporting In Vivo Experiments

Carol Kilkenny1, William J Browne2, Innes C Cuthill3, Michael Emerson4 and Douglas G Altman5

*1The National Centre for the Replacement, Refinement and Reduction of Animals in Research, London, UK, 2School of Veterinary Science, University of Bristol, Bristol, UK, 3School of Biological Sciences, University of Bristol, Bristol, UK, 4National Heart and Lung Institute, Imperial College London, UK, 5Centre for Statistics in Medicine, University of Oxford, Oxford, UK.*

|  | | ITEM | RECOMMENDATION | Section/ Paragraph |
| --- | --- | --- | --- | --- |
| 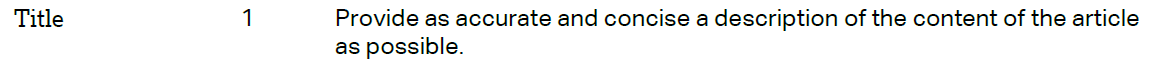 | | | Title page |
| 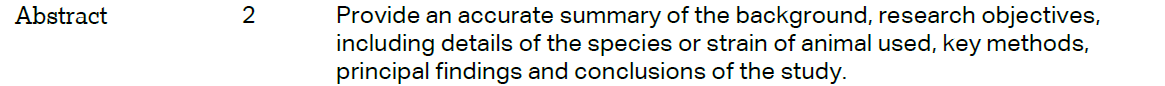 | | | Abstract |
| INTRODUCTION | | |  |
| 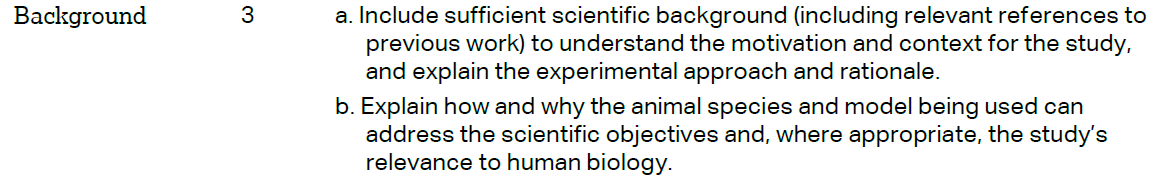 | | | Introduction  Introduction |
| 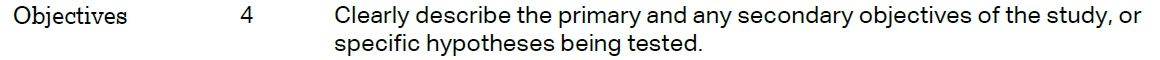 | | | Introduction |
| METHODS | | |  |
| 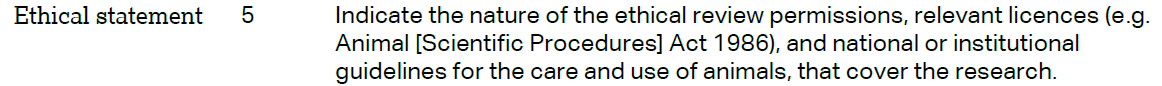 | | | Materials and Methods |
| 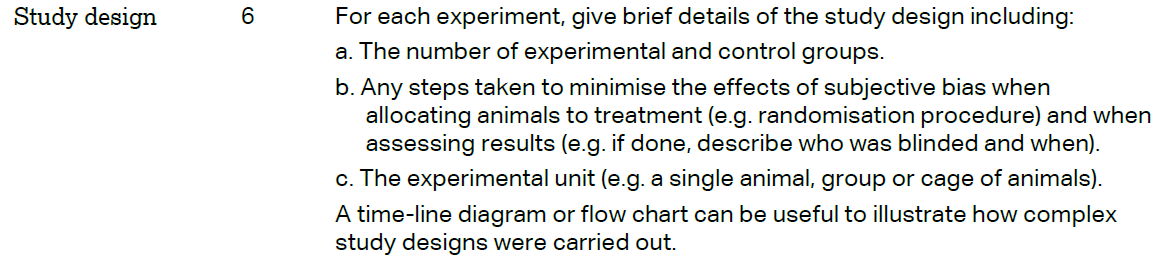 | | | Materials & Methods  Materials & Methods  Materials & Methods |
| 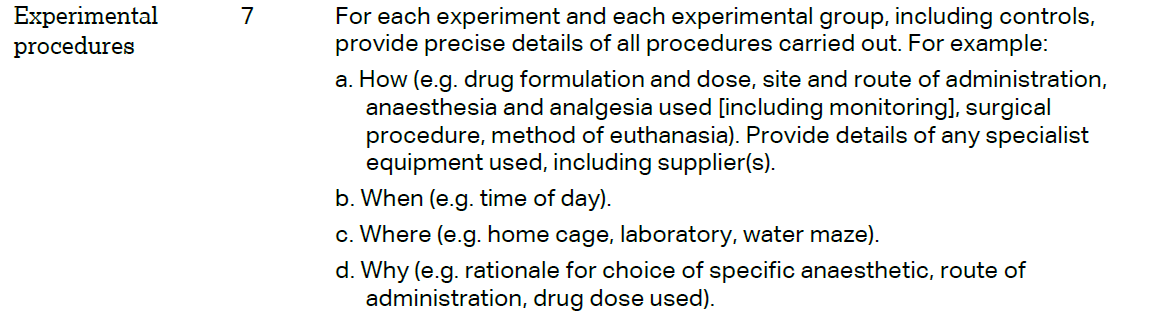 | | | Materials & Methods  Materials & Methods  Materials & Methods  Materials & Methods |
| 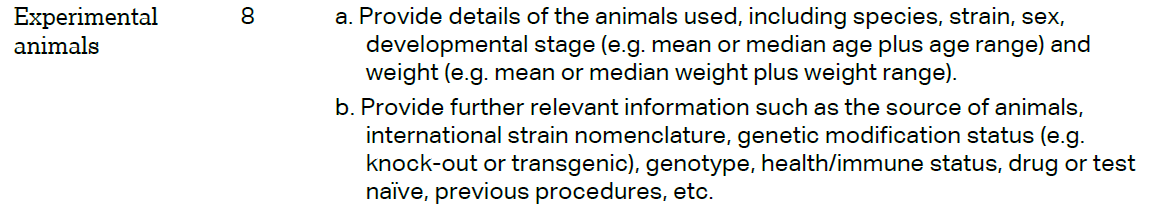 | | | Materials & Methods  Materials & Methods |

The ARRIVE guidelines. Originally published in *PLoS Biology*, June 20101

| 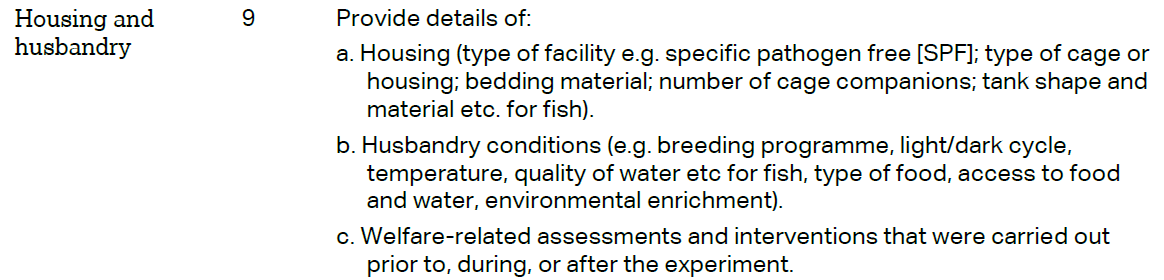 | Materials & Methods  Materials & Methods  Materials & Methods | |
| --- | --- | --- |
| 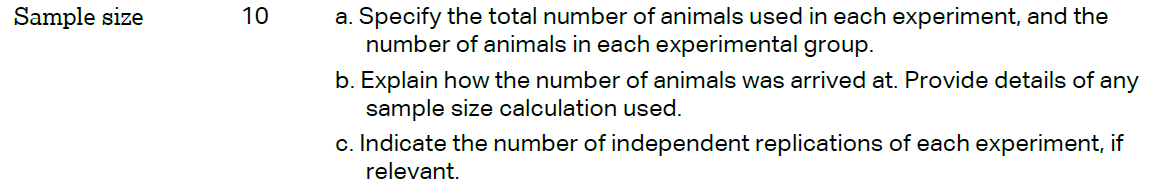 | Materials & Methods  Results  Results | |
| 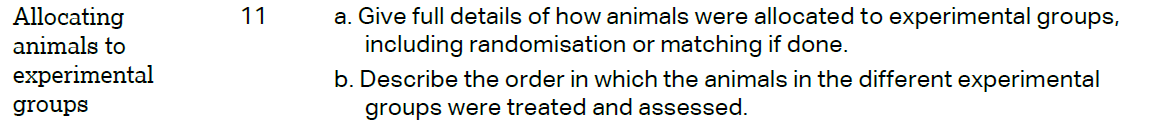 | Methods & Materials  Methods & Materials | |
| 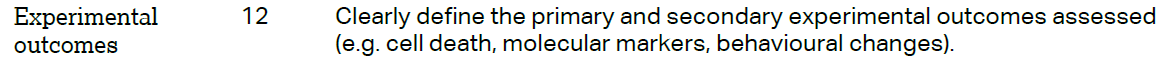 | Materials & Methods | |
| 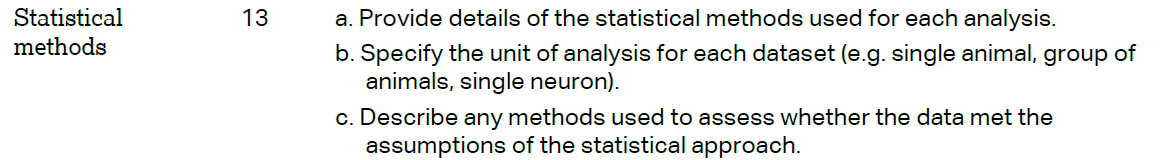 | Materials & Methods  Results  Materials & Methods | |
| RESULTS |  | |
| 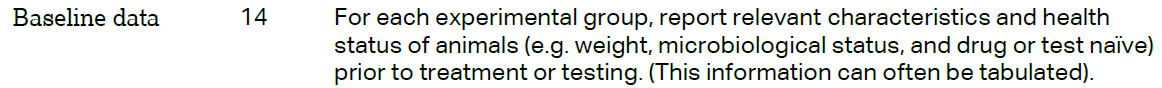 | Materials & Methods | |
| 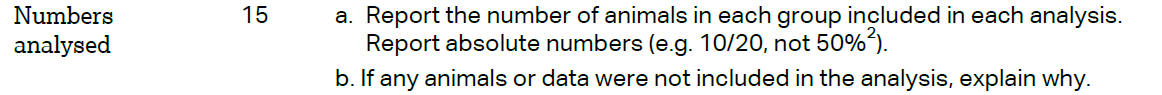 | Results | |
| 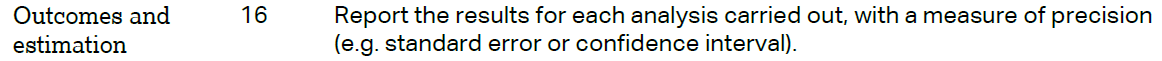 | Results | |
| 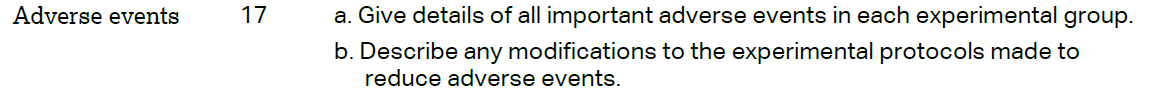 | Results | |
| DISCUSSION |  | |
| 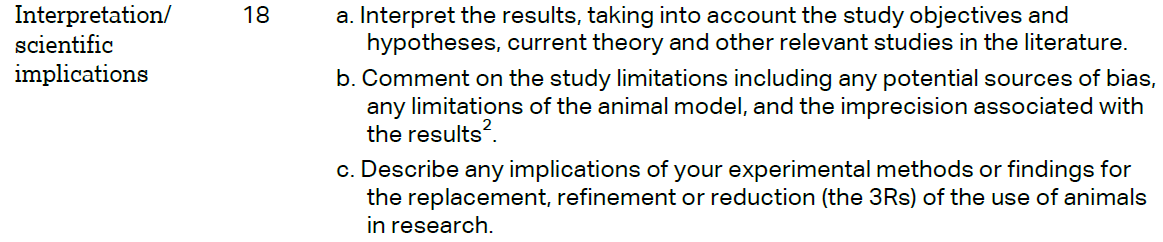 | Discussion  Discussion  N/A | |
| 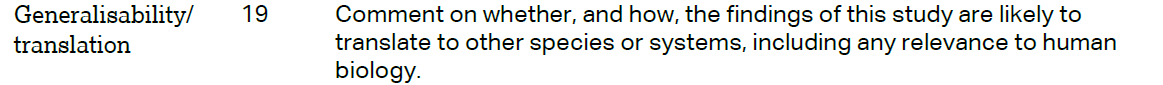 | Discussion | |
| 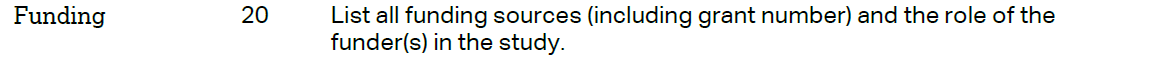 | | Acknowledgements |


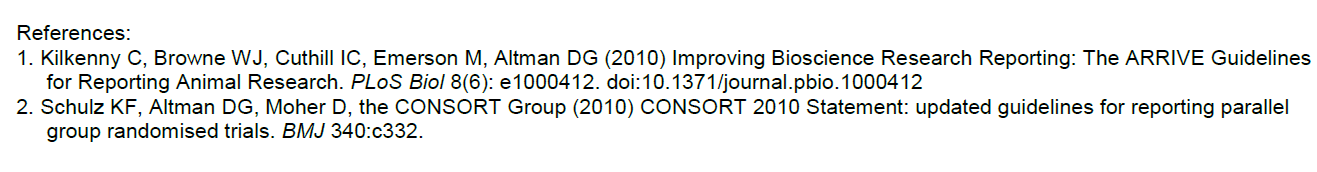

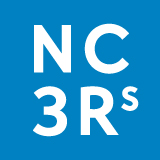

Supplement: S1 Checklist — (DOCX) [file pone.0116933.s001.docx]
